# Supplementary material for: Biotic Soil Organic Carbon (SOC) Stock: What We Had & What We Lost
Source: Preprints.org preprint supplement (doi:10.20944/preprints202212.0258.v1), 2022-12-14
Supplement: Supplementary file 3 [file supplementary]

## Sheet: Sheet1
Strzlecki, P.E: Physical description of New South Wales and Van Diemen’s land: accompanied by a geological map, section and diagrams, and figures of organic remains. Printed by Longman, Brown, Green and Longmans London (1845).
https://archive.org/details/PhysicalDescriptionOfNewSouthWalesAndVanDiemensLand/page/n425									Here the original data is re-calculated to give a "per dry weight" measure of soil carbon ALSO CHECKED AGAINST HIS TABLE ON PP 429-430 THAT HAS MANY MISTAKES!!! - RJB Nov., 2019
NOTE: in the data where he says "Loss" this is not loss on ignition, rather it is the shortfall of the date to add up to 100%												SOM values are divided by 2 to give SOC from latest van Bemmelen calculations (Pribyl 2010).
								True SOM	True CaCO3			Most fertile			Least fertile	From Stezlecki 1945: tab:
Site	State	Location	Specific Gravity (BD?)	Org matter	Water %	CaCO3	Dry %	SOM%	CaCO3%			Site	SOM %	Water %	Site	SOM %	Water %		His Notes on Soils
1	NSW	Karua	1.9	18.44	6.53	2.7	93.47	17.2359	2.52369			1	17.2359	6.53					Unmanured
2	NSW	Karua	2.2	15.6	5.5	2	94.5	14.742	1.89			2	14.742	5.5					Manured
3	NSW	Karua	na	7.3	4	6.2	96	7.008	5.952			3	7.008	4					Unmanured
4	NSW	Karua	na	8.1	3	6.5	97	7.857	6.305			4	7.857	3					Same but deeper sample
5	NSW	Karua	na	9	4	3.2	96	8.64	3.072		Just Tas	5	8.64	4					Unmanured
6	NSW	Karua	na	10	5.2	2.5	94.8	9.48	2.37			6	9.48	5.2					Manured
7	NSW	Karua	1.4	6.8	2	2.5	98	6.664	2.45					2	7	6.664	2		Unmanured
8	NSW	Karua	na	7.5	3	1.2	97	7.275	1.164			8	7.275	3					Manured
9	NSW	Vale of Clywd, Mt York	2.5	2.2	2	6	98	2.156	5.88					2	9	2.156	2		Sterile after drought
10	NSW	Mt Tomah	1.6	15	8	8	92	13.8	7.36			10	13.8	8					Natural soil?
11	NSW	Mt Canoblas	2	5	1	7.2	99	4.95	7.128					1	11	4.95	1		Defective soil?
12	NSW	Mt Wingen	2.9	3.5	2.5	6.2	97.5	3.4125	6.045					2.5	12	3.4125	2.5		Abandoned due to blight
13	NSW	?	3.5	4	0.5	1.5	99.5	3.98	1.4925					0.5	13	3.98	0.5		Native soil unculitivated
14	Tas	Mona Vale	1.1	37.75	24.4	10.3	75.6	28.539	7.7868			14	28.539	24.4					Swamp soil
15	Tas	Mona Vale	na	34.05	22.8	1.5	77.2	26.2866	1.158			15	26.2866	22.8					Bit higher up
16	Tas	Mona Vale	1.7	9.7	8	na	92	8.924						8	16	8.924	8		Plain, unmanured
17	Tas	Mona Vale	1.3	10.6	12.8	na	87.2	9.2432						12.8	17	9.2432	12.8		Sour, unmanured
18	Tas	Brickendon	2.2	11	6	2.1	94	10.34	1.974			18	10.34	6					Manured
19	Tas	Brickendon	2.75	8	5	2	95	7.6	1.9					5	19	7.6	5		Unmanured
20	Tas	Longford	3.27	7.49	10	5.26	90	6.741	4.734			?		10	?				Unmanured
21	Tas	Circular Head	1.95	9.28	10	5.4	90	8.352	4.86			21	8.352	10					Manured
22	Tas	Circular Head	2.7	18.93	8.5	4.2	91.5	17.3209	3.843			22	17.3209	8.5					Unmanured
23	Tas	Circular Head	6.09	4.33	8	na	92	3.9836						8	23	3.9836	8		Crops fail
24	Tas	Break o'-day	2.24	8.5	6.6	8.1	93.4	7.939	7.5654			24	7.939	6.6					Limestone
25	Tas	Break o'-day/Malachite	2.77	2.16	1	15	99	2.1384	14.85			?		1	?				Unmanured
26	Tas	Break o'-day/Malachite	2.8	5.4	4	4.54	96	5.184	4.3584					4	26	5.184	4		Unmanured
27	Tas	Quamby	1.79	10.6	5.5	5.5	94.5	10.017	5.1975			27	10.017	5.5					Unmanured
28	Tas	Quamby	2.54	4	3	4.8	97	3.88	4.656					3	28	3.88	3		Sour, unmanured
29	Tas	Bothwell	2.61	3.6	1.5	5.65	98.5	3.546	5.56525			?		1.5	?				Unmanured
30	Tas	Logan	2.08	3.65	1	2.5	99	3.6135	2.475					1	30	3.6135	1		Unmanured
31	Tas	Glen Leith	1.99	11.5	5.2	3.8	94.8	10.902	3.6024			31	10.902	5.2					Cultivated
32	Tas	Glen Leith	2	9.5	4	2.9	96	9.12	2.784			32	9.12	4					Cultivated
33	Tas	North Esk	2.2	5.2	3.1	10	96.9	5.0388	9.69					3.1	33	5.0388	3.1		Crops fail
34	Tas	Franklin	1.9	7.2	3.1	2.1	96.9	6.9768	2.0349					3.1	34	6.9768	3.1		Sterile
35	Tas	Pt Effingham	3.2	8	4	3.5	96	7.68	3.36					4	35	7.68	4		Crops fail
36	Tas	Piper	2.5	4	3	10.9	97	3.88	10.573					3	36	3.88	3		Unmanured
37	Tas	Cape Portland	2.5	2.5	1.5	9	98.5	2.4625	8.865					1.5	37	2.4625	1.5		Gravelly
38	Tas	St George	2	4	3.05	1.5	96.95	3.878	1.45425					3.05	38	3.878	3.05		Crops fail
39	Tas	Lake Country	1.25	20.1	10.1	6.2	89.9	18.0699	5.5738			39	18.0699	10.1					Natural soil
40	Tas	Huyon	1.3	18	18	7.5	82	14.76	6.15			40	14.76	18					Productive
41	Tas	Delareyne	3.2	6.5	2.3	6.1	97.7	6.3505	5.9597				6.3505	2.3					Unmanured, stterile
Mean			2.34086	9.70683	5.91902	5.15921	94.081	8.77969	4.85796			19 vs 18	SOM %	H2O%		SOM %	H2O%
			BD	SOM	H2O	CaCO3	CinCaCO3	True SOM	True CaCO3	CinCaCO3	TOTAL C%	MEAN	13.3703	12.7726		5.19483	3.75278
Just NSW (13 soils)			2.25	8.64923	3.63308	4.28462	0.514154	8.24618	4.12555	0.495066	8.74125
Just Tas (28 soils or 25 for CaCO3)			2.36778	10.1979	6.98036	5.614	0.67368	9.02738	5.23882	0.628658	9.65604
		MEANS	2.30889	9.42354	5.30672	4.94931	0.593917	8.63678	4.68218	0.561862	9.19865	% Diff	157.376	240.351
										CaCO3-C as % of total C		times	2.57376	3.40351		NOTE: Much CaCO3 is from earthworm calciferous glands!
		These from		So CaCO3 adds on average 6.1% to SOM for total C NSW soils						5.66357	%
		calculator not		So CaCO3 adds on average 7.8% to SOM for total C in Tas soils						6.51051	%	Compare to Dr Christine Jones piece on Soil saving our bacon - https://web.archive.org/web/20200315053953/http://www.farminstitute.org.au/_literature_68254/AGE2010_Paper_Dr_Christine_Jones
		spreadsheet::::		So on average adds		6.95	% to total C		MEAN	6.1081	%	Her figures are slightly wrong as they are on a wet weight basis, not dry weight as are mine.
			JUST NSW		Good vs bad soil						JUST TASMANIA		Good vs bad soil
			8 vs 5								12 vs 13	Most fertile soils in Tasmania			Least fertile soils in Tasmania
				MEAN	10.7547	5.90375		4.2325	1.6			MEAN	13.9997	16.2875		5.56495	4.58077
				Wet wt	SOM %	H2O%	True (dry)	SOM %	H2O%				SOM %	H2O%		SOM %	H2O%
				% Diff	154.099	268.984						% Diff	151.57	255.563
				times	2.54099	3.68984						times	2.5157	3.55563
				Overall mean SOM for all NSW soils -				8.24618	%			Overall mean SOM for all Tas soils -				9.02738	%
				Overall mean SOC for all NSW soils -				4.1	%			Overall mean SOC for all Tas soils -				4.5	%
		(Note: prior to 1851 the state of Victoria was part of the colony of New South Wales										This is consistent with Dr Bill Coching 2018: fig. 3 that shows Tas SOC decline from mean of 5% to 2.5% in about 40 years of cultivation - http://www.billcotching.com/Cotching_Geoderma_2017.pdf .
												His fig. 3 (from Sparrow et al. 2013: fig. 1) for cultivation between 1972 - 2010 or 38 years.
		Christine Jones 2009 Appendix C tabulates range of SOC in Victoria of 0.9 to 5.8 % with median value about 2.9%.										So SOC goes from around 5% in 1840s to about 5% in 1970s then to 2.5% in 2010!
		https://www.amazingcarbon.com/PDF/JONES-SoilSequestrationInquiry(17Dec09).pdf										Or -50% in 38 years of cultivation.
		This 2.9% compares to the range of 2.2 to 17.2 with median 9.7% found by Strzelecki for NSW.										HOW MUCH SOIL CARBON IS LOST IN TOTAL FROM TAS AND CAN IT BE RESTORED TO RESET CLIMATE?
		She notes: "On average, 12 tonnes of topsoil are eroded for every tonne of wheat currently produced in
		Australia. Greater losses are experienced on more fragile soils. For example, over 200										Cotching 2018: tab. 2 SOC
		tonnes of topsoil are eroded for each tonne of wheat produced in some parts of the Wimmera										Farm	ha	Total C t	Ct/ha
		region in western Victoria.										farmA	460	46446	100.97
		No civilisation can survive the physical destruction of its primary resource base - the soil."										farmB	753	82446	109.49
												farmC	305	58212	190.859
														MEAN	133.773	Ct/ha
												Chart of decline of SOC% carbon under cultivation compared to Srzelecki's data baseline
												Study date	1845	1972	2009	% decline	%decline last 37 years
												"NSW"	4.1		2.9	29.2683
												Tasmania	5	5	2.5	50	50
												total years		127	164
															MEAN	39.6341	% decline
